# Supplementary material for: Amphiphilic Copolymer of Polyhedral Oligomeric Silsesquioxane (POSS) Methacrylate for Solid Dispersion of Paclitaxel
Source: MDPI journal article supplement (doi:10.3390/ma12071058), 2019-03-30
Supplement: s1 [file s1]

Supplementary Materials

# Amphiphilic Copolymer of Polyhedral Oligomeric Silsesquioxane (POSS) Methacrylate for Solid Dispersion of Paclitaxel

Suchismita Chatterjee and Tooru Ooya \*

Graduate School of Engineering, Department of Chemical Science and Engineering, Kobe University; Kobe, 657-8501, Japan, suchismita@stu.kobe-u.ac.jp

\* Correspondence: ooya@tiger.kobe-u.ac.jp; Tel.: +81-78-803-6255

Received: 21 February 2019; Accepted: 27 March 2019; Published: date

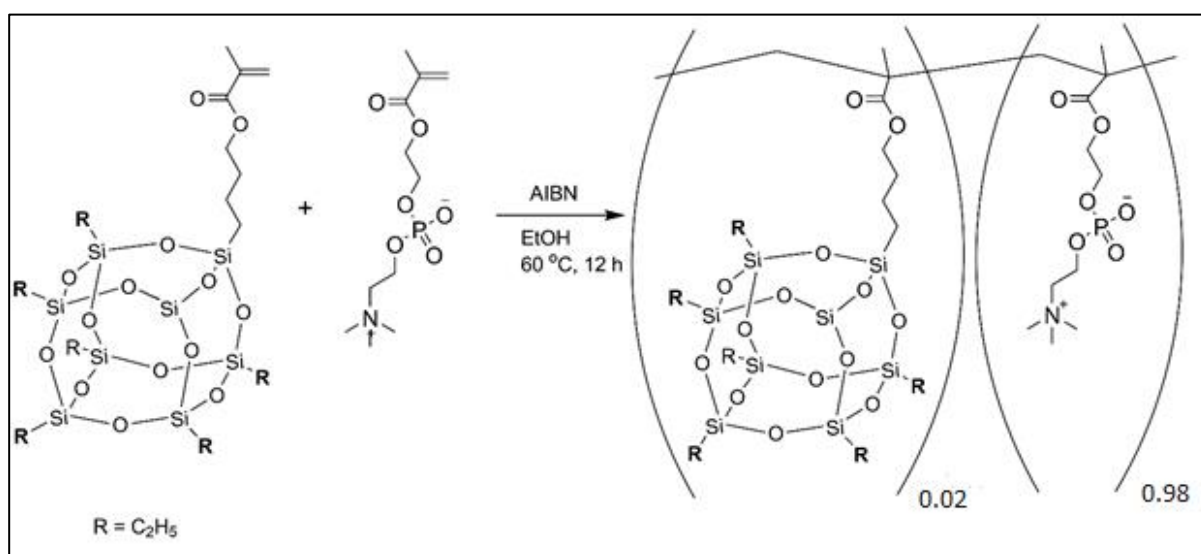

Figure S1. Synthesis of MPC-*ran*-C<sub>2</sub>H<sub>5</sub>-POSS.

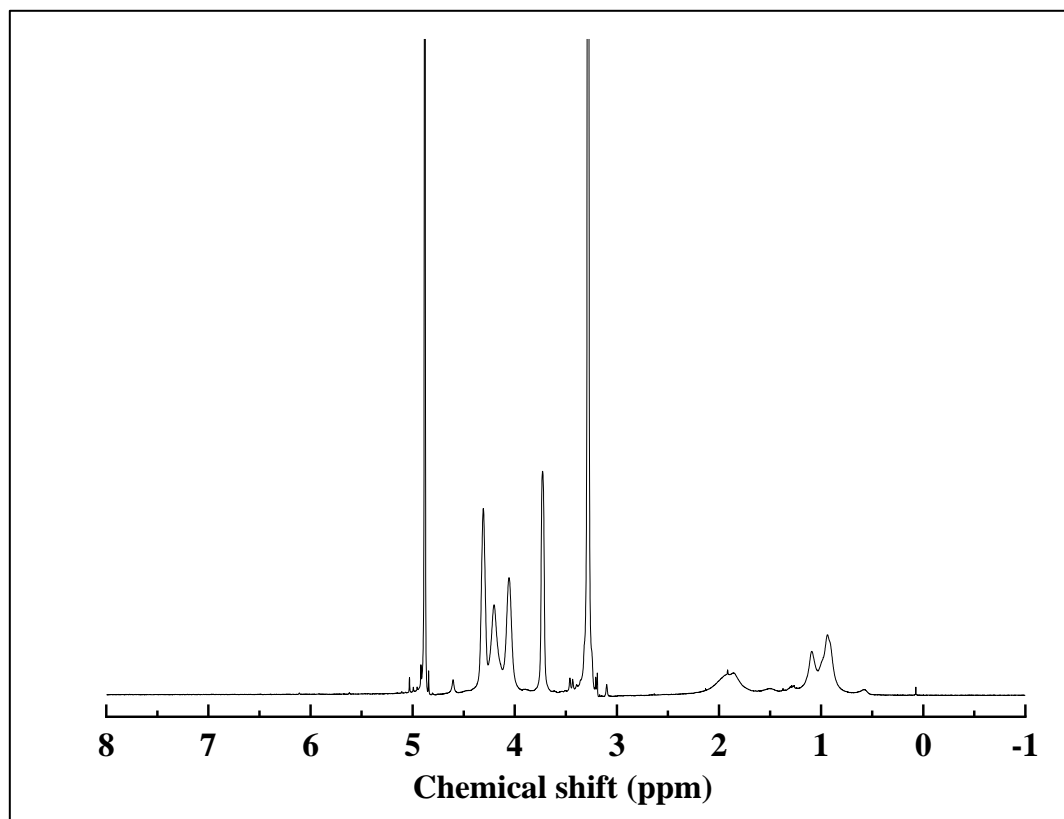

**Figure S2.** A  $^1\text{H}$  NMR spectrum of MPC-*ran*-C<sub>2</sub>H<sub>5</sub>-POSS in methanol-*d*<sub>4</sub>.

$^1\text{H}$  NMR (400 MHz) spectra obtained from methanol-*d*<sub>4</sub>  $\delta$ : 0.94 [s, -C-CH<sub>3</sub>], 1.91 [s, -CH<sub>2</sub>-], 3.28 [s, -N(CH<sub>3</sub>)<sub>3</sub>], 3.9-4.3 [m, -OCH<sub>2</sub>], 3.76 [s, -CH<sub>2</sub>N], 0.59 [s, -Si-CH<sub>2</sub>-].

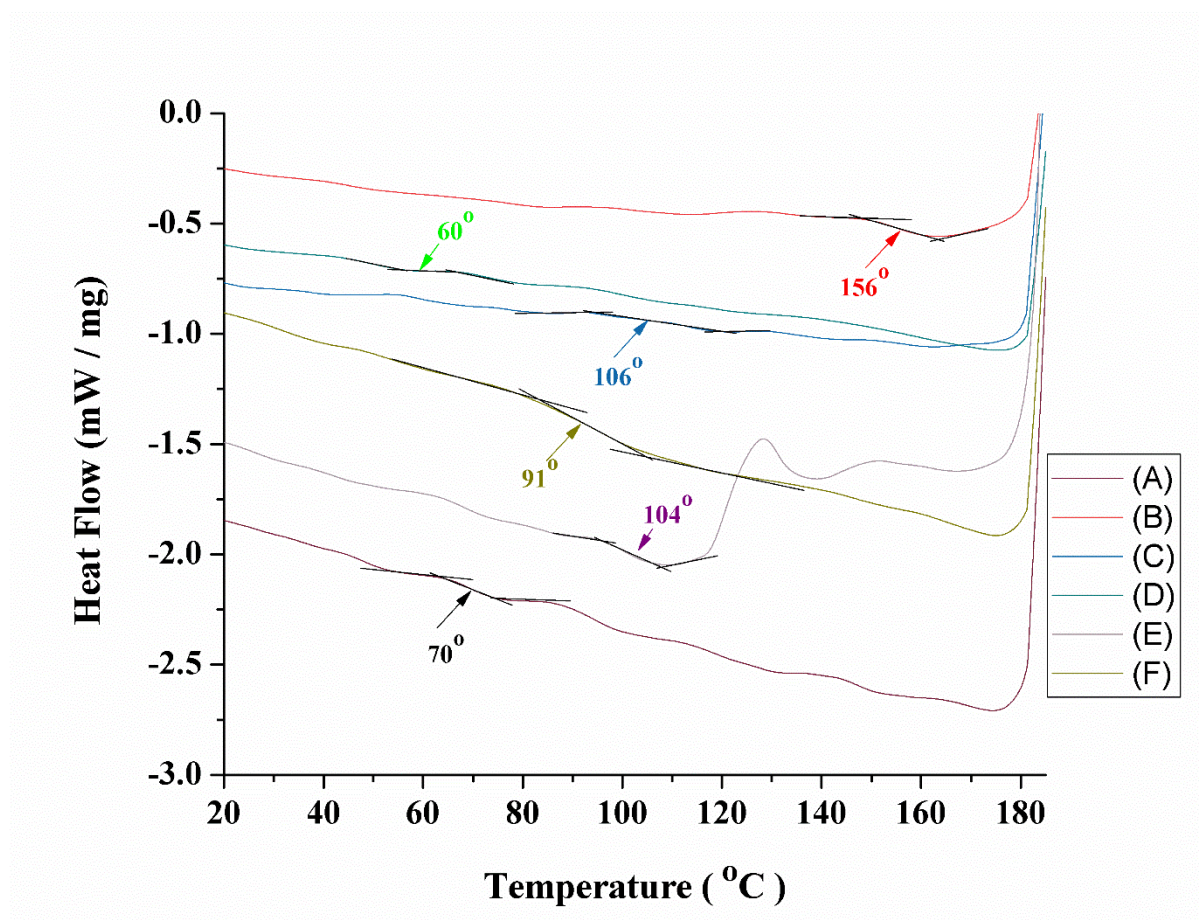

**Figure S3.** DSC thermograms (the 2<sup>nd</sup> heating) of A: MPC-*ran*-C<sub>2</sub>H<sub>5</sub>-POSS; B: PVP; C: PTX; D: MPC-*ran*-C<sub>2</sub>H<sub>5</sub>-POSS/PTX; E: PVP/PTX; F: MPC-*ran*-C<sub>2</sub>H<sub>5</sub>-POSS/PVP/PTX.

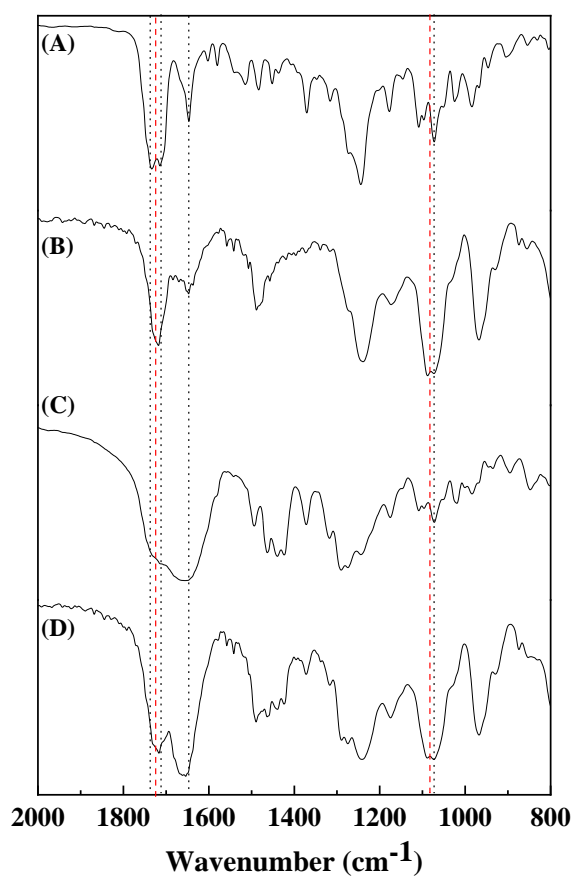

**Figure S4.** FT-IR spectra of A: PTX; B: MPC-*ran*-C<sub>2</sub>H<sub>5</sub>-POSS/PTX physical mixture; C: PVP/PTX physical mixture; D: MPC-*ran*-C<sub>2</sub>H<sub>5</sub>-POSS/PTX /PVP/PTX physical mixture.
